# Supplementary material for: Measurement report: Diurnal variations of brown carbon during two distinct seasons in a megacity in northeast China
Source: Copernicus journal article supplement (doi:10.5194/acp-23-6241-2023), 2023-06-07
Supplement: Supplementary file 1 [file acp-23-6241-2023-supplement.pdf]

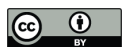

*Supplement of*

## **Measurement report: Diurnal variations of brown carbon during two distinct seasons in a megacity in northeast China**

**Yuan Cheng et al.**

*Correspondence to:* Jiu-meng Liu ([jiumengliu@hit.edu.cn](mailto:jiumengliu@hit.edu.cn))

The copyright of individual parts of the supplement might differ from the article licence.

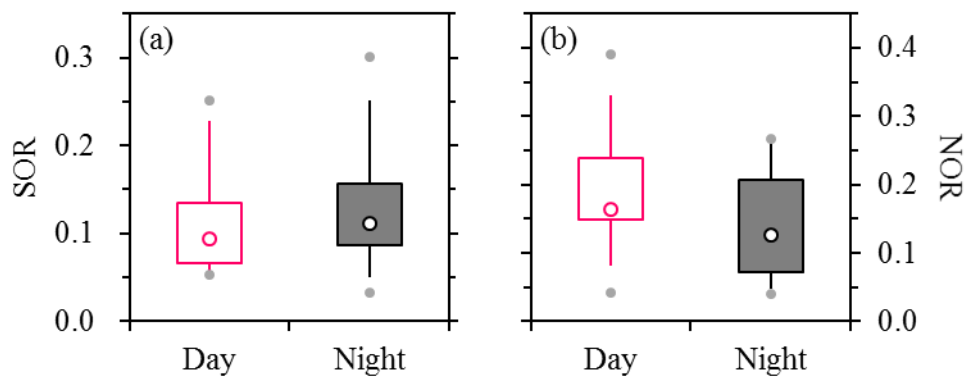

**Figure S1.** Diurnal variations of (a) SOR and (b) NOR in spring. NOR were considerably higher during the day, pointing to enhanced photochemistry. Daytime and nighttime SOR were more comparable, presumably due to the rare occurrence of high RH conditions that are favorable for heterogeneous sulfate formation.

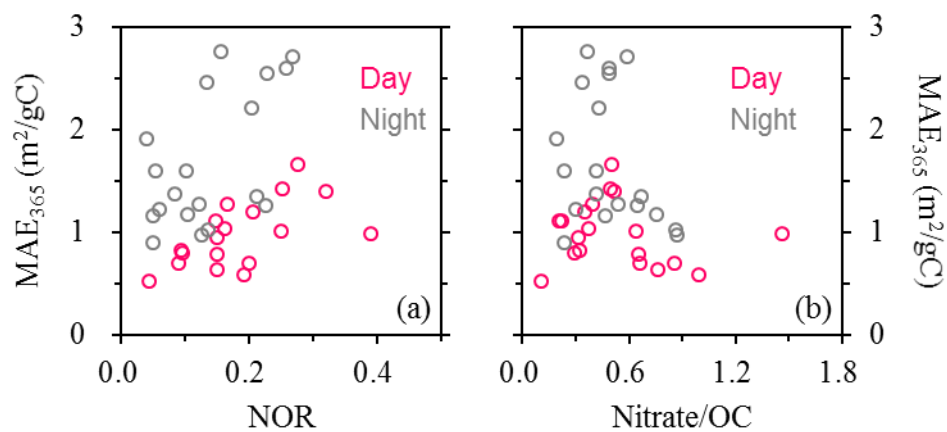

**Figure S2.** Dependences of MAE<sub>365</sub> on (a) NOR and (b) the nitrate to OC ratio in spring. As indicated by the diurnal variations of NOR, nitrate formation was mainly contributed by photochemistry. However, MAE<sub>365</sub> was independent of NOR or nitrate/OC, suggesting that photochemistry should not be an important influencing factor for the springtime MAE<sub>365</sub>.

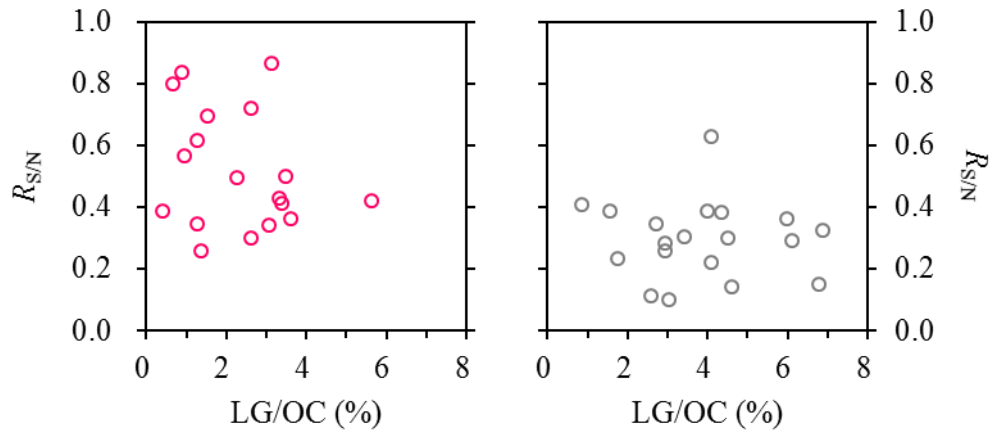

**Figure S3.** Relationships between  $R_{S/N}$  and LG/OC in spring, with daytime and nighttime results shown in the left and right panels, respectively.

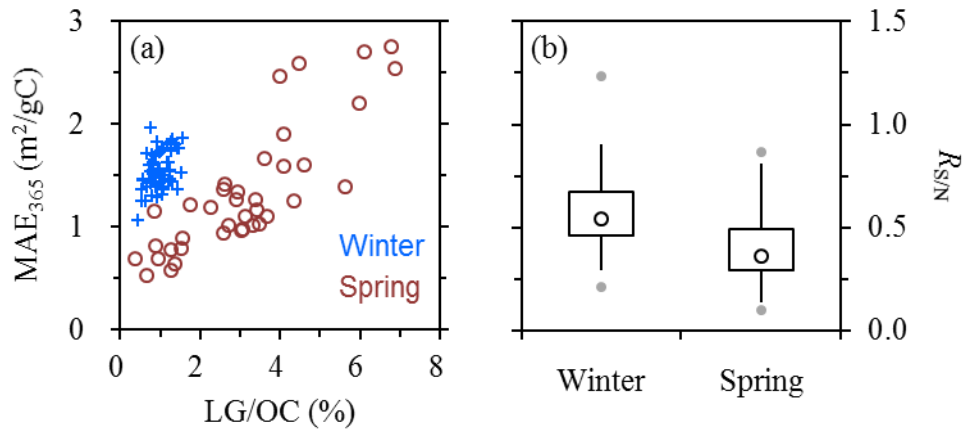

**Figure S4.** Comparisons of (a) the MAE<sub>365</sub> vs. LG/OC relationship and (b)  $R_{S/N}$  between winter and spring.

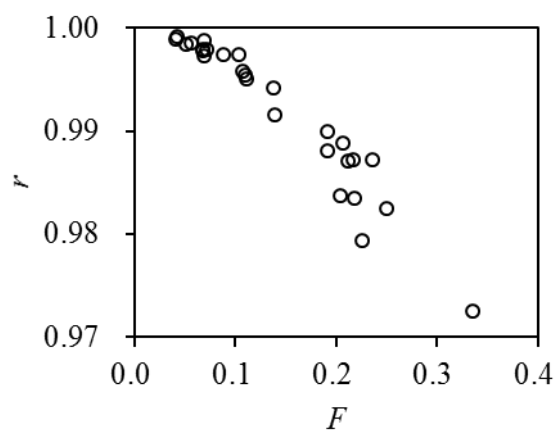

**Figure S5.** Dependence of  $r$  on  $F$  during agricultural fire episodes in spring.  $r$  was determined by regressing  $\ln(ATN_\lambda)^*$  on  $\ln(\lambda)$ , while  $F$  was a measure of the significance of the  $\sim 365$  nm absorption peak.  $r$  showed a clear decreasing trend with the increase of  $F$ . The same trend was observed when plotting  $r$  against  $K$ , another indicator for the significance of the  $\sim 365$  nm absorption peak.

**Table S1.** Summary of *t*-test results for the comparisons involved in the main text. A *p* value of below 0.05 indicates statistically significant difference at the 95% confidence level.

| Compared parameters                                                                                                               | <i>p</i> value of <i>t</i> -test | Indication                                                                                           |
|-----------------------------------------------------------------------------------------------------------------------------------|----------------------------------|------------------------------------------------------------------------------------------------------|
| <i>Winter campaign</i>                                                                                                            |                                  |                                                                                                      |
| Daytime and nighttime MAE <sub>365</sub>                                                                                          | 0.004                            | More absorbing BrC at night                                                                          |
| Daytime and nighttime LG/OC (LG/EC)                                                                                               | 0.001 (0.000)                    | Increased residential burning emissions at night                                                     |
| Daytime and nighttime R <sub>S/N</sub>                                                                                            | 0.000                            | Increased vehicle emissions at night                                                                 |
| Daytime and nighttime SOR in the RH range of 70–80%                                                                               | 0.417                            | Relatively weak influence of photochemistry on sulfate formation                                     |
| Daytime and nighttime NOR in the RH range of 70–80%                                                                               | 0.005                            | Relatively strong influence of photochemistry on nitrate formation                                   |
| Daytime and nighttime AAE                                                                                                         | 0.000                            | Stronger wavelength dependence of BrC absorption at night                                            |
| Daytime and nighttime sulfate/OC                                                                                                  | 0.011                            | Decreased SOC/OC ratios at night                                                                     |
| <i>Spring campaign</i>                                                                                                            |                                  |                                                                                                      |
| Daytime and nighttime MAE <sub>365</sub>                                                                                          | 0.000                            | More absorbing BrC at night                                                                          |
| Daytime and nighttime LG/OC                                                                                                       | 0.006                            | Increased agricultural fire emissions at night                                                       |
| Daytime and nighttime R <sub>S/N</sub>                                                                                            | 0.000                            | Increased vehicle emissions at night                                                                 |
| Daytime and nighttime SOR                                                                                                         | 0.489                            | Insignificant diurnal variations of sulfate formation                                                |
| Daytime and nighttime NOR                                                                                                         | 0.083                            | Insignificant diurnal variations of nitrate formation                                                |
| <i>r</i> values for typical samples and open burning episodes [derived from linear regression of ln(ATN <sub>λ</sub> )* on ln(λ)] | 0.000                            | Agricultural fire-induced non-linearity for BrC's absorption spectra shown on ln-ln scale            |
| <i>Inter-campaign</i>                                                                                                             |                                  |                                                                                                      |
| LG/K <sup>+</sup> in winter and spring                                                                                            | 0.000                            | Different biomass burning ways in the two seasons (i.e., residential and open burning, respectively) |
| LG/OC in winter and spring                                                                                                        | 0.000                            | Stronger impacts of biomass burning in spring                                                        |
| SOR in winter and spring                                                                                                          | 0.050                            | —                                                                                                    |
| NOR in winter and spring                                                                                                          | 0.012                            | Significant seasonal variations of nitrate formation                                                 |
| Wintertime MAE <sub>365</sub> and MAE <sub>365</sub> of typical samples in spring                                                 | 0.000                            | Less absorbing BrC in spring with the absence of agricultural fires                                  |

**Table S2.** Summary of observational results in January, 2021.

|                                                                | Daytime       | Nighttime     | All           |
|----------------------------------------------------------------|---------------|---------------|---------------|
| Temperature ( °C)                                              | -16.23 ± 5.13 | -21.28 ± 5.54 | -18.72 ± 5.87 |
| Relative humidity (%)                                          | 70.73 ± 8.10  | 81.10 ± 5.03  | 75.83 ± 8.51  |
| OC (µgC/m <sup>3</sup> )                                       | 21.53 ± 8.54  | 21.27 ± 11.94 | 21.40 ± 10.26 |
| MSOC (µgC/m <sup>3</sup> )                                     | 19.74 ± 7.73  | 19.56 ± 10.81 | 19.65 ± 9.29  |
| EC (µgC/m <sup>3</sup> )                                       | 3.12 ± 1.69   | 2.62 ± 1.96   | 2.87 ± 1.83   |
| LG (µg/m <sup>3</sup> )                                        | 0.45 ± 0.24   | 0.57 ± 0.44   | 0.51 ± 0.35   |
| SO <sub>4</sub> <sup>2-</sup> (µg/m <sup>3</sup> )             | 9.49 ± 4.28   | 7.97 ± 5.03   | 8.74 ± 4.69   |
| NO <sub>3</sub> <sup>-</sup> (µg/m <sup>3</sup> )              | 9.53 ± 5.84   | 9.56 ± 8.24   | 9.55 ± 7.06   |
| Cl <sup>-</sup> (µg/m <sup>3</sup> )                           | 2.60 ± 1.22   | 2.25 ± 1.19   | 2.43 ± 1.21   |
| NH <sub>4</sub> <sup>+</sup> (µg/m <sup>3</sup> )              | 8.10 ± 3.96   | 7.25 ± 4.80   | 7.68 ± 4.38   |
| K <sup>+</sup> (µg/m <sup>3</sup> )                            | 1.01 ± 0.41   | 1.08 ± 0.78   | 1.05 ± 0.62   |
| ( <i>b</i> <sub>abs</sub> ) <sub>365</sub> (Mm <sup>-1</sup> ) | 30.00 ± 13.34 | 32.48 ± 20.94 | 31.22 ± 17.39 |
| MAE <sub>365</sub> (m <sup>2</sup> /gC)                        | 1.48 ± 0.18   | 1.61 ± 0.15   | 1.55 ± 0.18   |
| AAE <sup>a</sup>                                               | 6.76 ± 0.11   | 7.33 ± 0.14   | 7.04 ± 0.32   |
| SOR                                                            | 0.14 ± 0.05   | 0.16 ± 0.09   | 0.15 ± 0.07   |
| NOR                                                            | 0.13 ± 0.05   | 0.11 ± 0.06   | 0.12 ± 0.06   |
| <i>R</i> <sub>S/N</sub>                                        | 0.69 ± 0.20   | 0.46 ± 0.13   | 0.58 ± 0.20   |
| LG/K <sup>+</sup>                                              | 0.42 ± 0.11   | 0.50 ± 0.10   | 0.46 ± 0.11   |
| LG/OC (%) <sup>b</sup>                                         | 0.88 ± 0.22   | 1.10 ± 0.26   | 0.99 ± 0.26   |
| LG/EC                                                          | 0.15 ± 0.05   | 0.22 ± 0.06   | 0.18 ± 0.07   |

Note:

<sup>a</sup> Calculated over 310–460 nm;<sup>b</sup> On a basis of carbon mass.



**Table S3.** Summary of observational results in April, 2021.

|                                                                | Daytime      | Nighttime    | All          |
|----------------------------------------------------------------|--------------|--------------|--------------|
| Temperature ( °C)                                              | 13.82 ±4.47  | 7.33 ±4.16   | 10.58 ±5.38  |
| Relative humidity (%)                                          | 42.65 ±17.35 | 62.21 ±17.43 | 52.43 ±19.81 |
| OC (µgC/m <sup>3</sup> )                                       | 16.64 ±14.57 | 22.49 ±19.99 | 19.57 ±17.51 |
| MSOC (µgC/m <sup>3</sup> )                                     | 14.36 ±13.06 | 20.23 ±18.27 | 17.30 ±15.94 |
| EC (µgC/m <sup>3</sup> )                                       | 1.35 ±0.94   | 1.71 ±0.95   | 1.53 ±0.95   |
| LG (µg/m <sup>3</sup> )                                        | 1.20 ±1.69   | 2.53 ±3.16   | 1.87 ±2.59   |
| SO <sub>4</sub> <sup>2-</sup> (µg/m <sup>3</sup> )             | 3.28 ±2.13   | 3.38 ±1.99   | 3.33 ±2.03   |
| NO <sub>3</sub> <sup>-</sup> (µg/m <sup>3</sup> )              | 8.97 ±9.07   | 10.79 ±9.10  | 9.88 ±9.01   |
| Cl <sup>-</sup> (µg/m <sup>3</sup> )                           | 1.79 ±2.51   | 4.84 ±5.88   | 3.32 ±4.72   |
| NH <sub>4</sub> <sup>+</sup> (µg/m <sup>3</sup> )              | 4.35 ±3.88   | 6.33 ±5.48   | 5.34 ±4.79   |
| K <sup>+</sup> (µg/m <sup>3</sup> )                            | 1.05 ±1.21   | 1.31 ±1.26   | 1.18 ±1.22   |
| ( <i>b</i> <sub>abs</sub> ) <sub>365</sub> (Mm <sup>-1</sup> ) | 17.22 ±20.53 | 43.66 ±53.16 | 30.44 ±41.95 |
| MAE <sub>365</sub> (m <sup>2</sup> /gC)                        | 0.98 ±0.31   | 1.69 ±0.65   | 1.33 ±0.62   |
| AAE <sup>a</sup>                                               | —            | —            | —            |
| SOR                                                            | 0.11 ±0.06   | 0.13 ±0.07   | 0.12 ±0.06   |
| NOR                                                            | 0.18 ±0.09   | 0.14 ±0.08   | 0.16 ±0.08   |
| <i>R</i> <sub>S/N</sub>                                        | 0.52 ±0.19   | 0.30 ±0.13   | 0.40 ±0.20   |
| LG/K <sup>+</sup>                                              | 0.98 ±0.45   | 1.58 ±0.61   | 1.28 ±0.61   |
| LG/OC (%) <sup>b</sup>                                         | 2.38 ±1.36   | 3.85 ±1.71   | 3.11 ±1.70   |
| LG/EC                                                          | 0.65 ±0.46   | 1.14 ±1.00   | 0.89 ±0.81   |

Note:

<sup>a</sup> AAE were not provided due to the frequent occurrences of agricultural fires, which could result in distinct peak at ~365 nm for the light absorption spectra of BrC.

<sup>b</sup> On a basis of carbon mass.
